# Supplementary material
Source: ML conference proceedings conference paper supplement (https://openreview.net/forum?id=mhHlsuGNRW)
Supplement: supplementary_material [file _ICLR_26__Dynamic_Mesh_data part.pdf › _ICLR_26__Dynamic_Mesh_data part.pdf]

## H SYNTHOMOTION-360 DATASET VISUALIZATION

In this section, we provide a visual overview of the seven animated sequences comprising our proposed *SynthoMotion-360* benchmark. As detailed in the main paper, this dataset is designed to rigorously evaluate the performance of dynamic reconstruction methods on scenes with complex and non-rigid motions. Figures [A8](#), [A9](#), [A10](#), [A11](#), [A12](#), [A13](#), [A14](#) showcase a representative frame from each curated sequence, highlighting the diversity and difficulty of the dynamics captured.

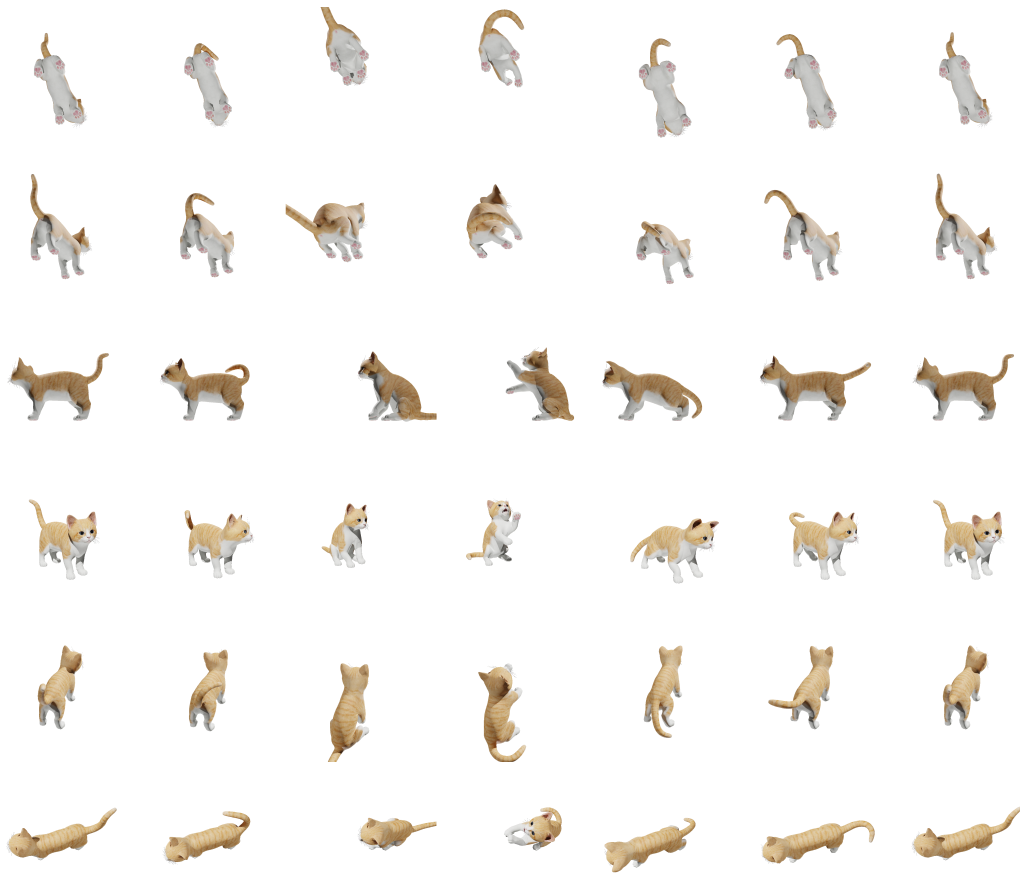

Figure A8: **Sequence: Cat.** A dynamic Cat sequence in our *SynthoMotion-360* dataset. Each row represents different time steps, and each column represents different camera views.



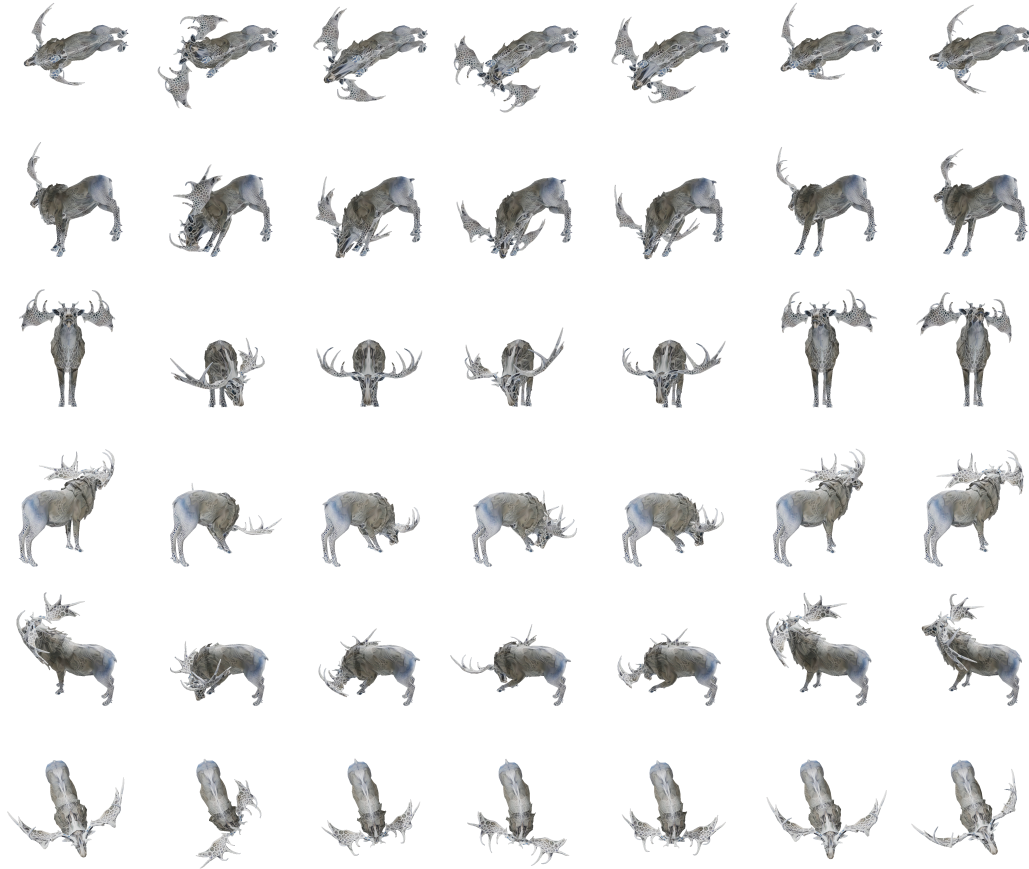

Figure A9: **Sequence: Deer.** A dynamic Deer sequence in our *SynthoMotion-360* dataset. Each row represents different time steps, and each column represents different camera views.

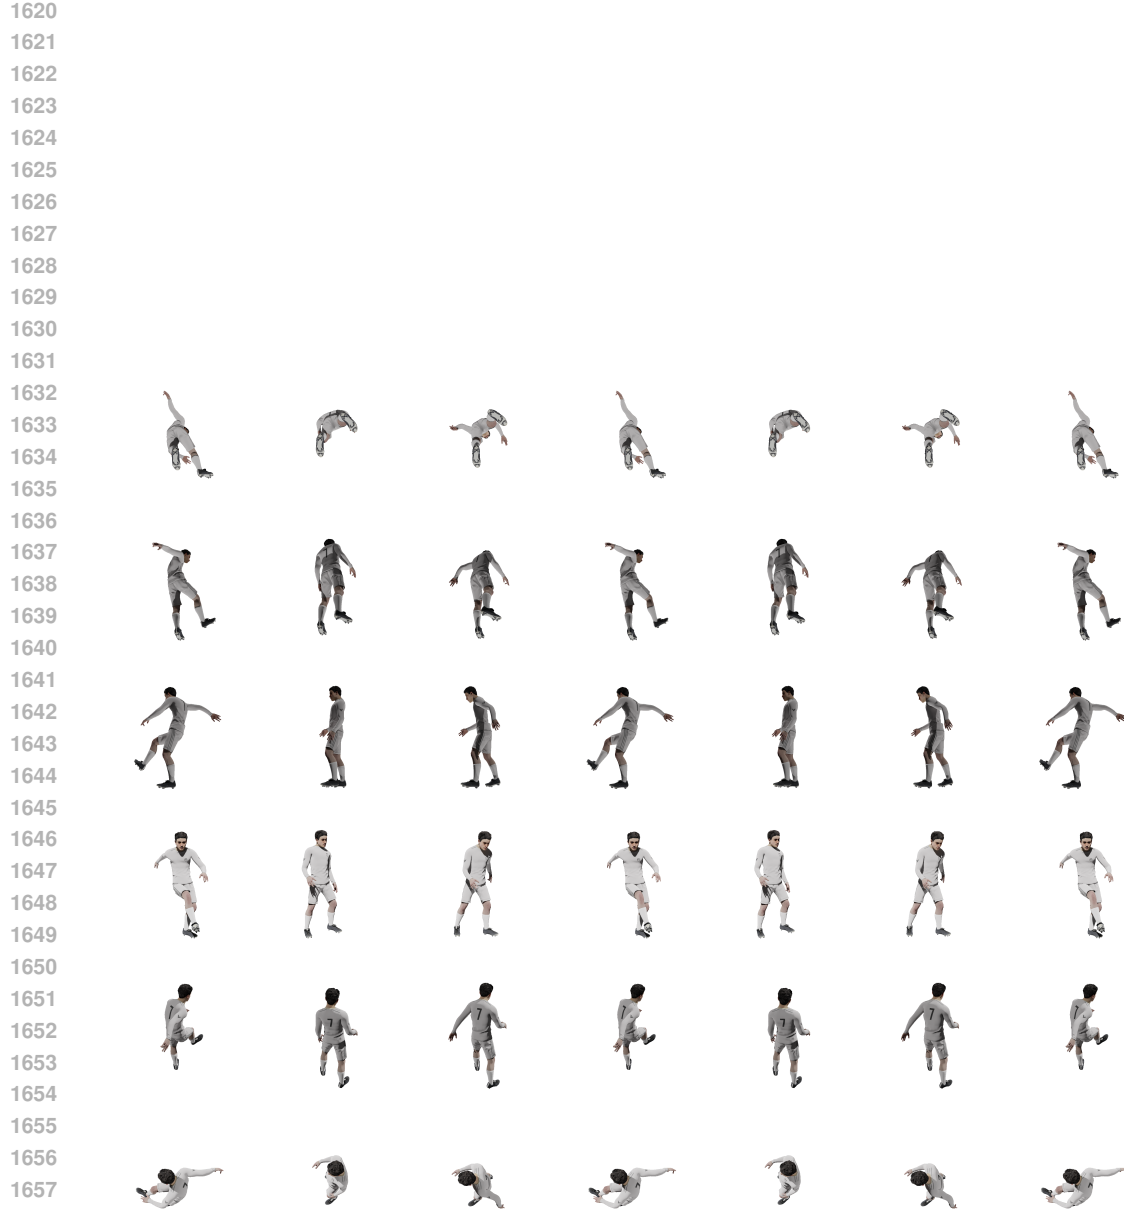

Figure A10: **Sequence: *Football Player*.** A dynamic Football Player sequence in our *SynthoMotion-360* dataset. Each row represents different time steps, and each column represents different camera views.

1674  
1675  
1676  
1677  
1678  
1679  
1680  
1681  
1682  
1683  
1684  
1685  
1686  
1687  
1688  
1689  
1690  
1691  
1692  
1693  
1694  
1695  
1696  
1697  
1698  
1699  
1700  
1701  
1702  
1703  
1704  
1705  
1706  
1707  
1708  
1709  
1710  
1711  
1712  
1713  
1714  
1715  
1716  
1717  
1718  
1719  
1720  
1721  
1722  
1723  
1724  
1725  
1726  
1727

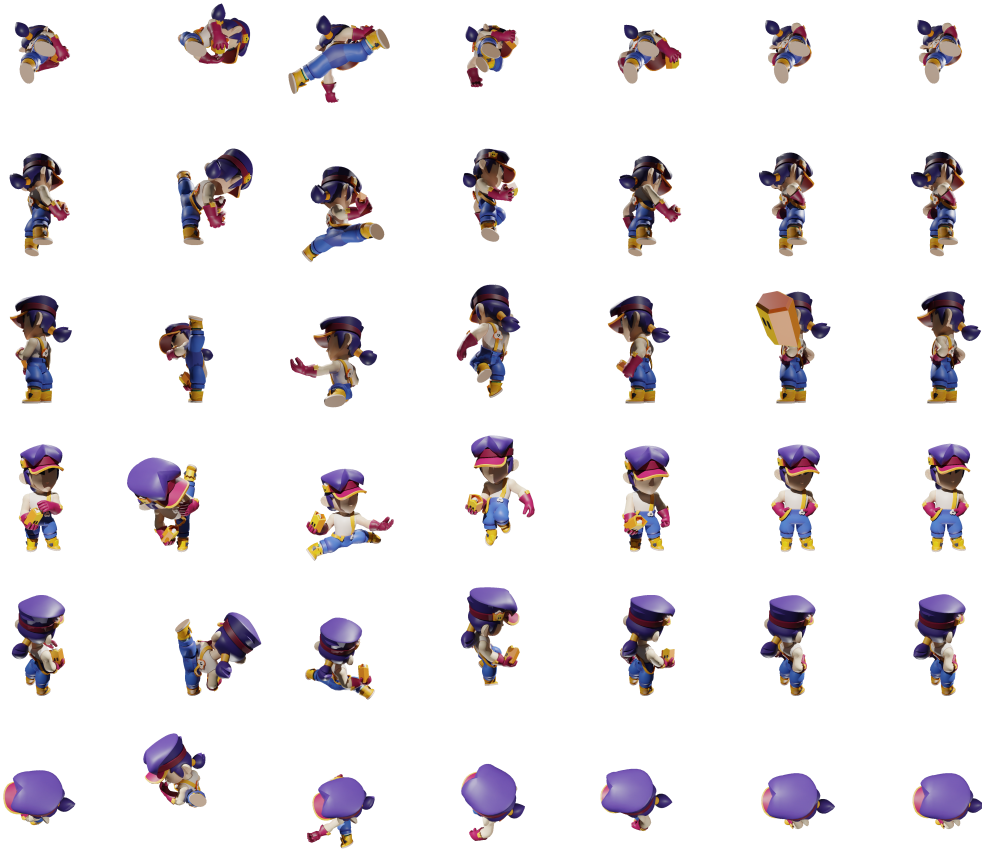

Figure A11: **Sequence:** *Stylized Character (Lego)*. A dynamic Lego sequence in our *SynthoMotion-360* dataset. Each row represents different time steps, and each column represents different camera views.

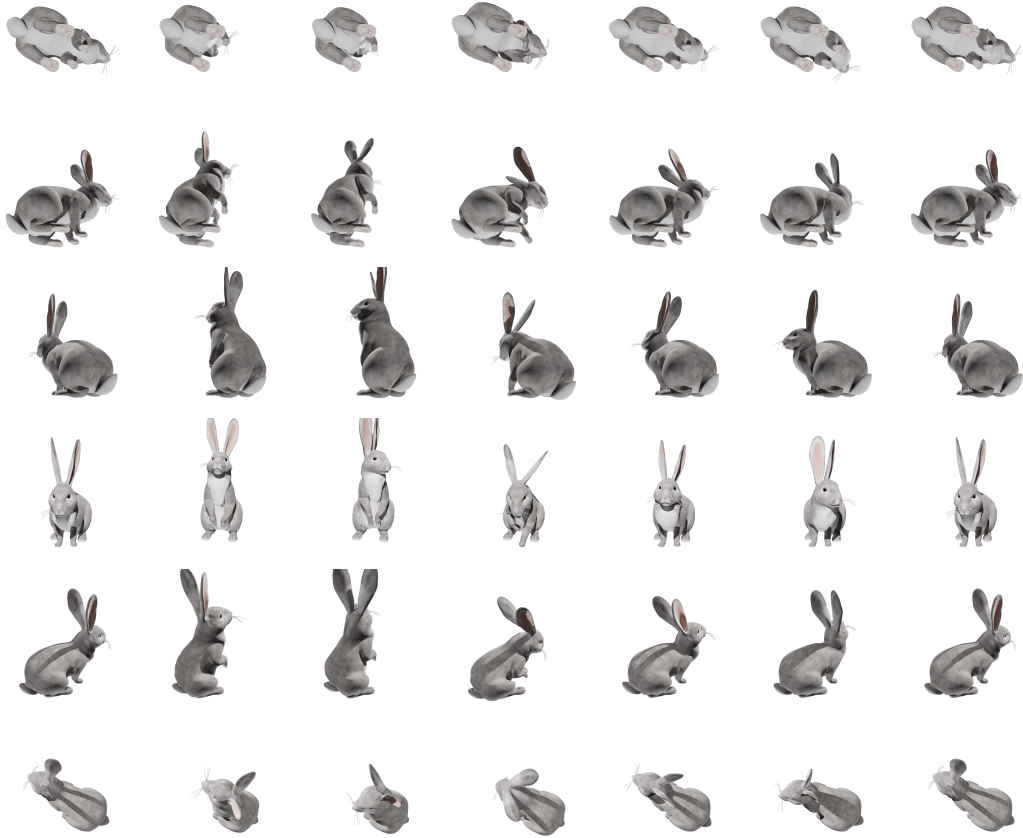

Figure A12: **Sequence: *Rabbit***. A dynamic Rabbit sequence in our *SynthoMotion-360* dataset. Each row represents different time steps, and each column represents different camera views.

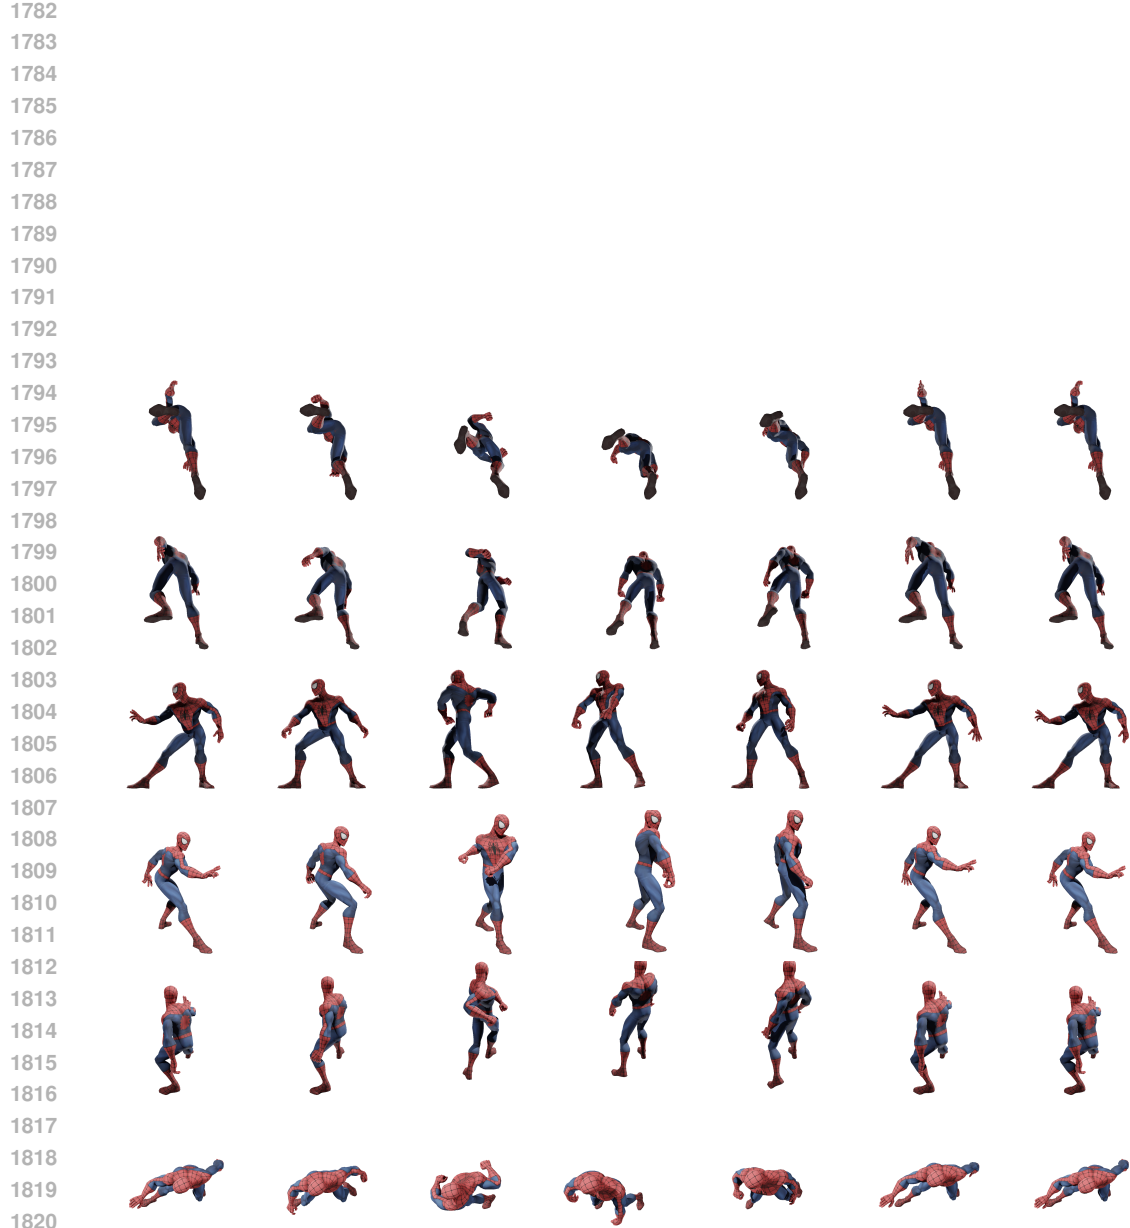

Figure A13: **Sequence: Spider-Man Fight.** A dynamic Spider-Man sequence in our *SynthoMotion-360* dataset. Each row represents different time steps, and each column represents different camera views.

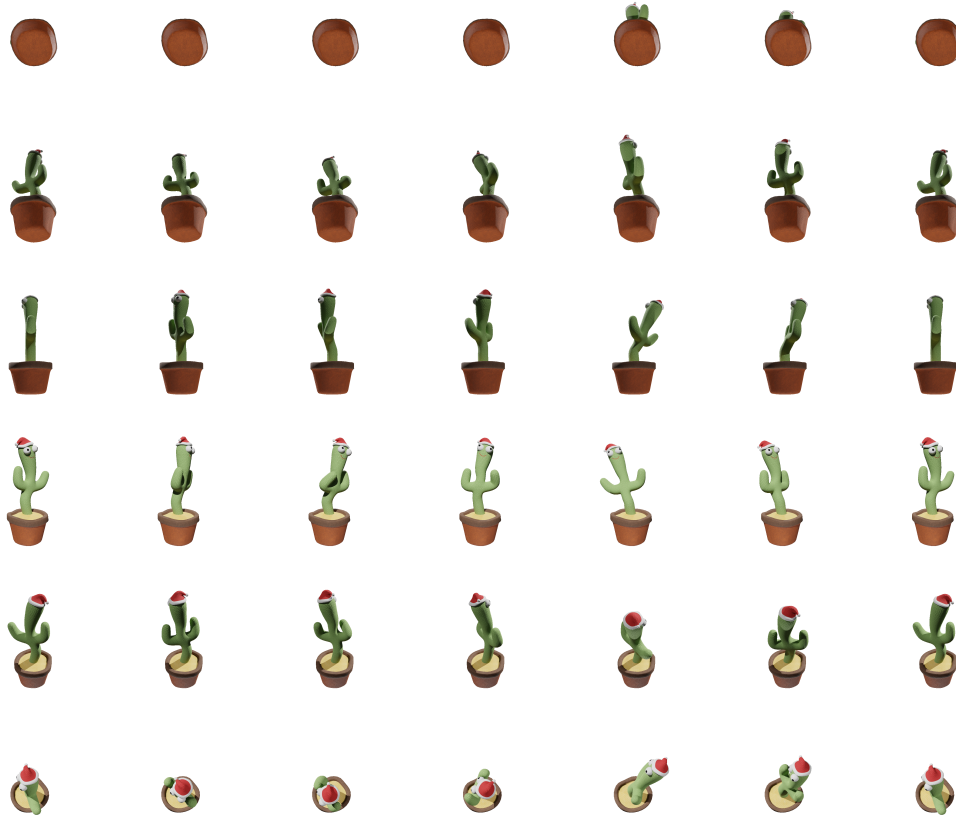

Figure A14: **Sequence: *Dancing Toy***. A dynamic Dancing Toy sequence in our *SynthoMotion-360* dataset. Each row represents different time steps, and each column represents different camera views.
